# Supplementary material
Source: Springer Nature journal article supplement (https://www.springermedizin.de/resource/supplementary/12984_2009_228_MOESM2_ESM.pdf/9605572)

A.

Low Effort, No Fatigue, Center

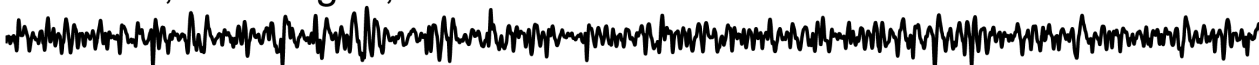

Location Shifted

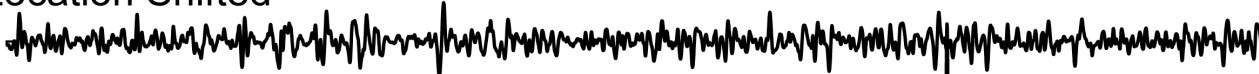

High Effort

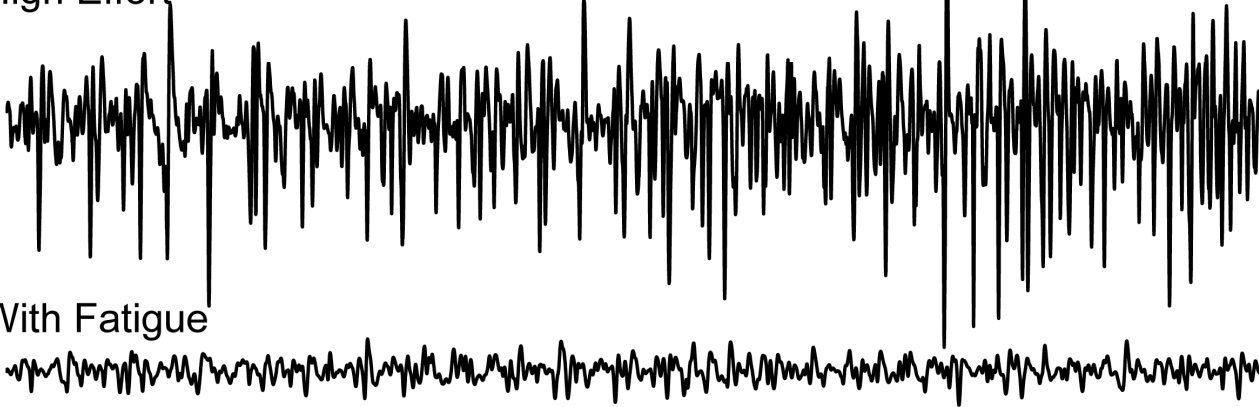

With Fatigue

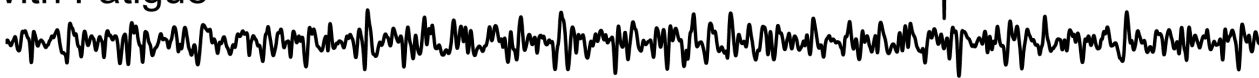

2V

0

0.2 Second

B.

 $\text{mV}^2\text{Hz}^{-1}$  $\times 10^5$ 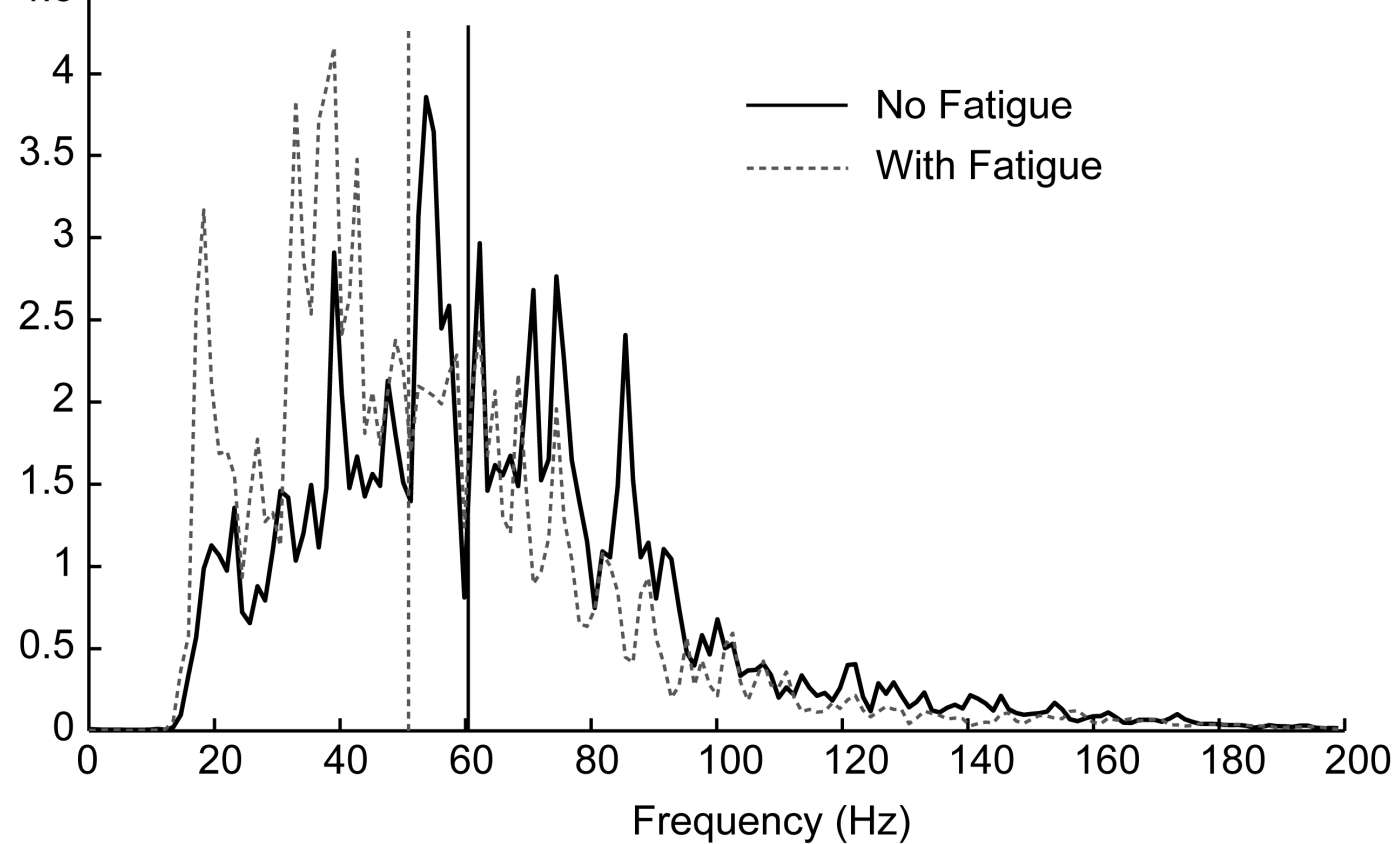

Supplement: MOESM2 [file 9605572]
